# Supplementary material
Source: ML conference proceedings conference paper supplement (https://openaccess.thecvf.com/content/ICCV2025/html/Ma_Robust_Test-Time_Adaptation_ICCV_2025_paper.html)
Supplement: Supplementary file 1 [file Ma_Robust_Test-Time_Adaptation_ICCV_2025_supplemental.pdf]

# Robust Test-Time Adaptation for Single Image Denoising Using Deep Gaussian Prior

## Supplementary Material

### 1. Implementation details

In our implementation, the window size  $W$  is 32, the patch size  $k$  is 7, and the number of non-local patches  $M$  is 16. The number of similar pixels  $p$  found at each spatial location is 20. The learning rate is set to  $1e^{-4}$  in synthetic noise experiments and  $1e^{-5}$  in real-world noise experiments. We use the Adam Optimizer to fine-tune the network for 10 iterations. For our data-set free single image denoising method, we utilize a straightforward CNN architecture, comprising five layers with 64 channels of  $3 \times 3$  convolutions, each followed by a leaky ReLU activation layer. In the final layer, we use a  $1 \times 1$  convolution. We use  $\ell_2$  loss and Adam Optimizer to train the network for 3,000 iterations. The learning rate is initialized to 0.001 and will decay by a factor of 2 when it reaches 1500, 2000, and 2500 iterations. We implement and train our network using the PyTorch framework on an NVIDIA RTX 3090 GPU.

### 2. Computational Efficiency

We compare the computational efficiency of deep learning based single image denoising methods. Table 1 details the average time required for denoising a single image from the PolyU dataset using different methods, along with the network parameters and PSNR results. Our method not only achieves the best performance, but its inference time is also significantly lower than that of the competing methods.

Table 1. Computational efficiency, network parameters, and PSNR of different methods under the input size  $256 \times 256 \times 3$ .

| Method       | DIP   | S2S   | ZS-N2N | MPI    | MASH   | Ours  |
|--------------|-------|-------|--------|--------|--------|-------|
| time (s)     | 59    | 1839  | 9      | 15     | 43     | 1     |
| Network size | 2.2 M | 1 M   | 22 K   | 0.56 M | 0.99 M | 1.26M |
| PSNR         | 34.75 | 35.97 | 35.17  | 36.55  | 31.97  | 36.71 |

### 3. Ablation Studies

To evaluate the effectiveness of each component of our method, we conducted the following ablation study on the Kodak24 dataset for synthetic noise and the PolyU dataset for real-world noise.

**Effect of window size  $W$ .** To explore the impact of window size on the proposed method, we report the algorithm’s performance under different values of  $W \in 24, 32, 40, 48$ . Table 2 shows the effect of window size on denoising performance. As illustrated in the table, whether for synthetic or real-world noise, the effect of different window sizes on the algorithm’s performance is minimal as long as the win-

dow size is sufficiently large. To balance performance and computational complexity, we choose  $W = 32$ .

Table 2. Denoising PSNR of ablation studies about window size  $W$ .

| Window Size             | 24    | 32    | 40    | 48    |
|-------------------------|-------|-------|-------|-------|
| PSNR ( $\sigma = 25$ )  | 30.81 | 30.84 | 30.84 | 30.84 |
| PSNR ( $\sigma = 50$ )  | 27.00 | 27.11 | 27.12 | 27.05 |
| PSNR ( $\lambda = 25$ ) | 28.68 | 28.71 | 28.71 | 28.73 |
| PSNR (real world)       | 36.70 | 36.71 | 36.71 | 36.71 |

**Effect of patch size  $k$ .** To evaluate the impact of different patch sizes on the proposed method, we report the algorithm’s performance under different values of  $k \in 5, 7, 9$ . Table 3 shows the performance of the algorithm for each value of  $k$ . From the table, it can be observed that the performance significantly improves when increasing  $k$  from 5 to 7, while further increasing  $k$  results in marginal performance gains. This is because smaller image blocks may lead to poor block similarity due to noise interference, whereas larger image blocks make it harder to find potentially similar blocks. Considering the trade-off between performance and computational complexity ( $k = 7$ , 0.48s vs.  $k = 9$ , 0.88s), we set  $k = 7$  for all cases in this paper.

Table 3. Denoising PSNR of ablation studies about patch size  $k$ .

| Patch Size              | 5     | 7     | 9     |
|-------------------------|-------|-------|-------|
| PSNR ( $\sigma = 25$ )  | 30.46 | 30.75 | 30.78 |
| PSNR ( $\sigma = 50$ )  | 26.13 | 27.11 | 27.18 |
| PSNR ( $\lambda = 25$ ) | 28.32 | 28.89 | 28.93 |
| PSNR (real world)       | 36.55 | 36.71 | 36.74 |

**Effect of the number of non-local patches  $M$ .** To evaluate the impact of different non-local patches on the proposed method, we report the algorithm’s performance under different values of  $M \in 12, 16, 20$ . Table 4 illustrates the correlation between network performance and  $M$ . It can be observed that the algorithm performs best when  $M = 16$ . Therefore, we choose  $M = 16$  in this paper.

**Effect of the number of similar pixels  $p$ .** Table 5 illustrates the correlation between network performance and the number of similar pixels,  $p$ . It can be observed that as  $p$  increases, the denoising performance of the network initially improves but then declines. This phenomenon can be at-

Table 4. Denoising PSNR of ablation studies about non-local patches  $M$ .

| Non-local Patch         | 12    | 16    | 20    |
|-------------------------|-------|-------|-------|
| PSNR ( $\sigma = 25$ )  | 30.74 | 30.75 | 30.73 |
| PSNR ( $\sigma = 50$ )  | 26.08 | 27.11 | 27.07 |
| PSNR ( $\lambda = 25$ ) | 28.86 | 28.89 | 28.88 |
| PSNR (real world)       | 36.69 | 36.71 | 36.71 |

tributed to the fact that increasing  $p$  enhances the network’s learning and generalization capabilities by expanding the training sample pool. On the other hand, excessively high  $p$  values reduce the similarity between pixels, leading to a decrease in the similarity of clean content in pseudo-samples used for fine-tuning, which negatively impacts network performance. Based on these observations, we select  $p = 20$  in our study.

**Effect of Adaptation Iterations for Each Image.** In this section, we investigate the impact of different adaptive iterations on each image. As shown in Table 6, we compare the TTA performance of our method using different iteration counts for each image. The test time includes the time to construct the pixel bank. When the number of iterations is small, the TTA Denoising model is unable to effectively learn how to remove noise from the images. Conversely, when the iteration count is too high, the performance improvements of TTA Denoising diminish. Additionally, for lower noise levels, the TTA Denoising model converges more quickly, while for higher noise levels (e.g.,  $\sigma = 50, \lambda = 10$ ), the network requires more iterations to achieve better performance. Therefore, for higher noise levels (e.g.,  $\sigma = 50, \lambda = 10$ ), we set the iteration count to 100, whereas for other cases, we set it to 10.

#### 4. More Visualization Results

In this part, we show more visualization comparison results of different denoising methods on test images of the Kodak24, MacMaster18, and KVASIR20 datasets. Figures 1, 2, 3, 4, and 5 show the denoising performance of different comparison methods. From these figures, it can be seen that while the S2S method achieves higher PSNR scores in some denoised images, it often produces overly smooth images. On the other hand, ZS-N2N performs poorly at higher noise levels, with the denoised images still containing a significant amount of noise. Visually, the images denoised by our method appear more pleasant.

Table 5. Denoising PSNR of ablation studies about similar pixels  $p$ .

| Similar Pixel           | 2     | 4     | 6     | 8     | 10    | 15    | 20    | 25    | 30    |
|-------------------------|-------|-------|-------|-------|-------|-------|-------|-------|-------|
| PSNR ( $\sigma = 25$ )  | 28.21 | 29.74 | 30.26 | 30.43 | 30.56 | 30.63 | 30.75 | 30.75 | 30.65 |
| PSNR ( $\sigma = 50$ )  | 22.26 | 24.78 | 25.84 | 26.35 | 26.69 | 27.05 | 27.11 | 27.11 | 26.82 |
| PSNR ( $\lambda = 25$ ) | 25.30 | 27.34 | 28.19 | 28.49 | 28.76 | 28.86 | 28.89 | 28.87 | 28.55 |
| PSNR (real world)       | 36.78 | 36.79 | 36.79 | 36.79 | 36.78 | 36.75 | 36.71 | 36.67 | 36.62 |

Table 6. Average PSNR scores for Gaussian and Poisson denoising on Kodak24 and real-world noise on PloyU. The best results are in **bold**.

| Iterations | Gaussian     |              |              | Poisson      |              |              | Real-world   | Time (s) |
|------------|--------------|--------------|--------------|--------------|--------------|--------------|--------------|----------|
|            | $\sigma=10$  | $\sigma=25$  | $\sigma=50$  | $\lambda=50$ | $\lambda=25$ | $\lambda=10$ |              |          |
| 0          | 32.66        | 29.70        | 20.94        | 29.62        | 24.82        | 19.94        | 36.10        | 0.00     |
| 1          | 33.41        | 30.50        | 22.80        | 30.42        | 26.51        | 22.01        | 36.29        | 0.50     |
| 2          | 34.21        | <b>30.86</b> | 24.59        | <b>30.81</b> | 27.62        | 23.85        | 36.39        | 0.51     |
| 5          | <b>34.78</b> | 30.82        | 25.71        | 30.75        | 28.56        | 25.21        | 36.50        | 0.55     |
| 10         | 34.75        | 30.75        | 26.39        | 30.51        | 28.89        | 25.82        | 36.71        | 0.62     |
| 20         | 34.47        | 30.43        | 26.65        | 30.39        | 28.85        | 26.10        | 36.88        | 0.74     |
| 50         | 34.13        | 30.35        | 26.94        | 30.35        | 28.98        | 26.49        | <b>36.90</b> | 1.12     |
| 100        | 33.82        | 30.27        | <b>27.11</b> | 30.26        | <b>28.99</b> | <b>26.64</b> | 36.88        | 1.79     |

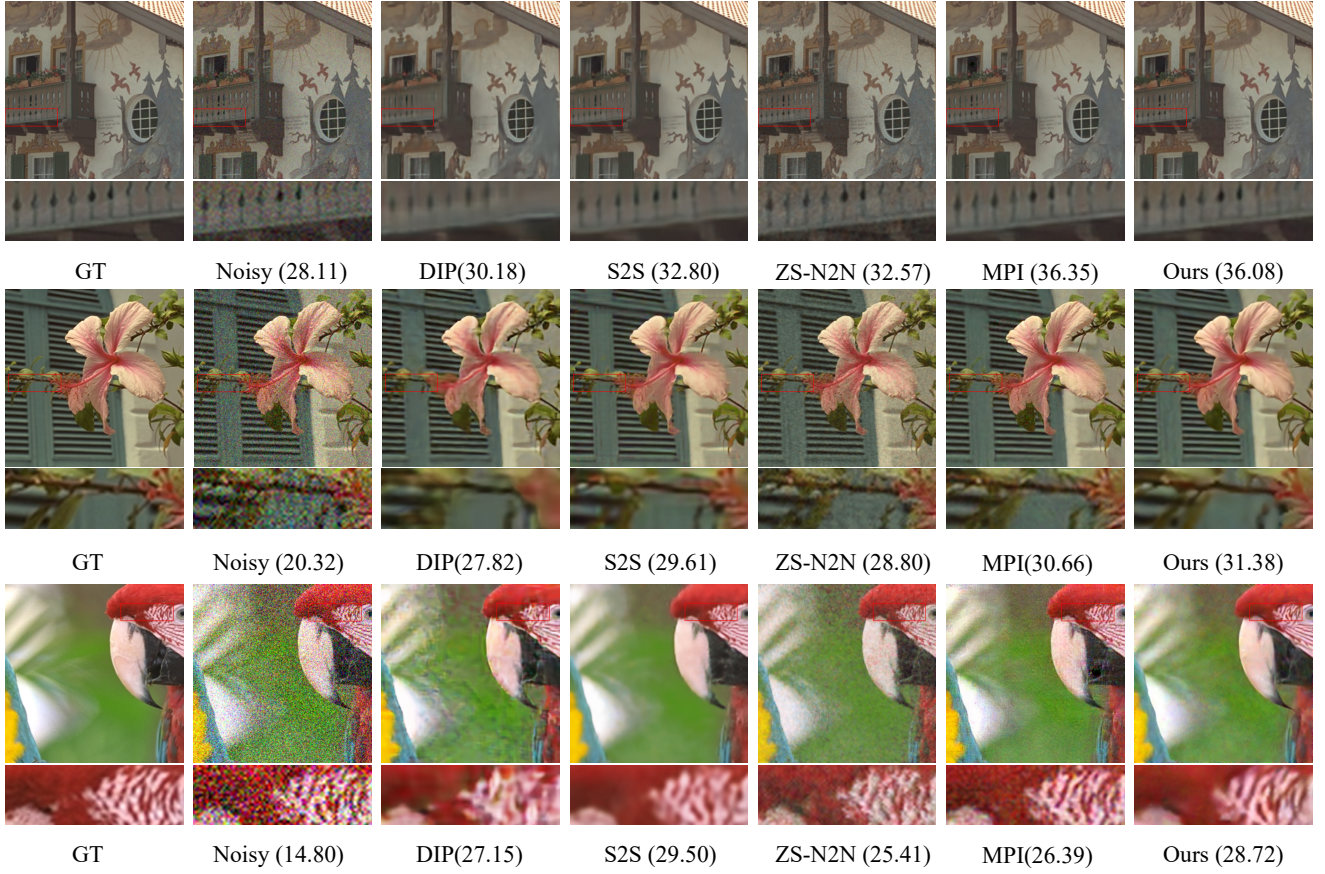

Figure 1. Gaussian denoising on Kodak24 images. The numbers in parentheses are PSNR scores (dB). Upper row:  $\sigma = 10$ , middle row:  $\sigma = 25$ , lower row;  $\sigma = 50$ .

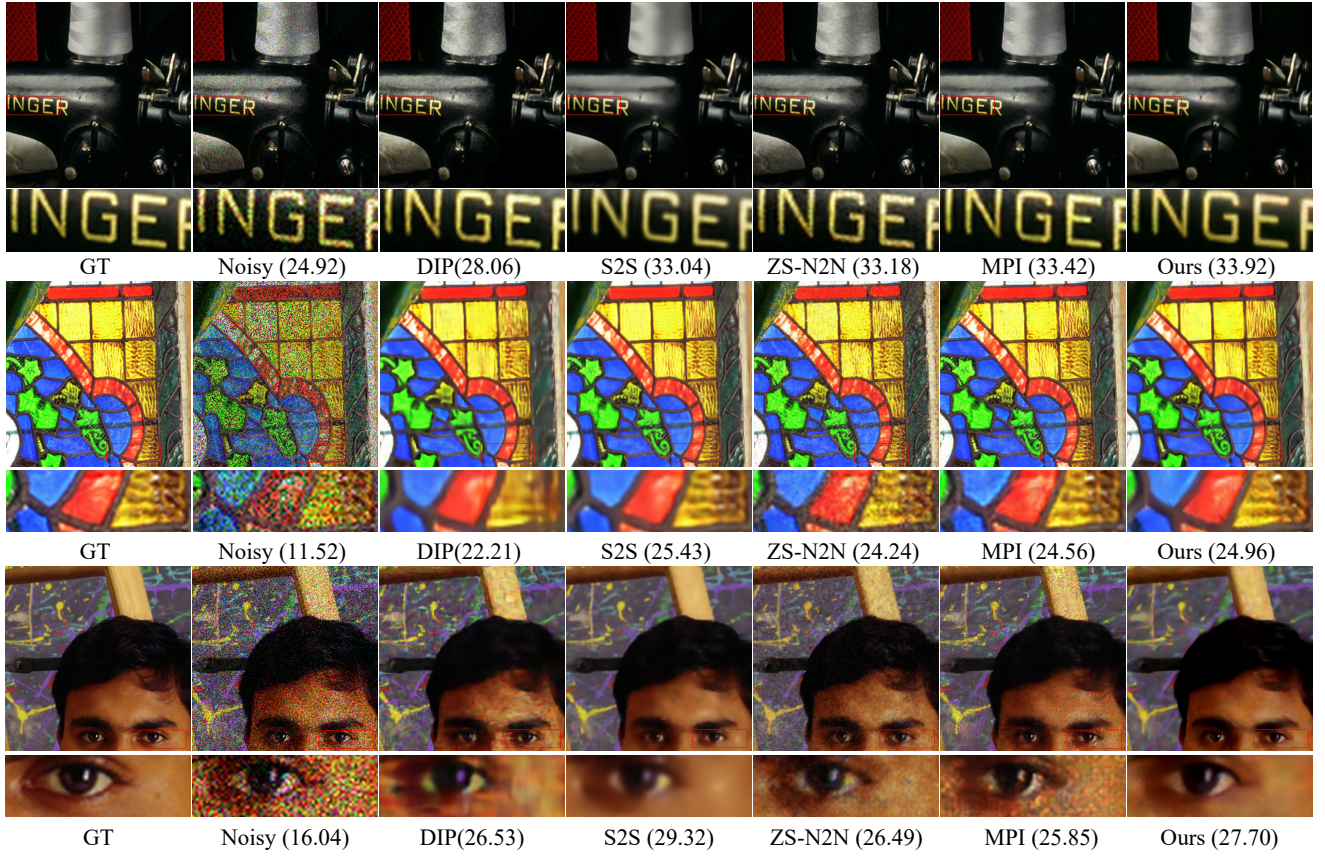

Figure 2. Poisson denoising on McMaster18 images. The numbers in parentheses are PSNR scores (dB). Upper row:  $\lambda = 50$ , middle row:  $\lambda = 25$ , lower row:  $\lambda = 10$ .

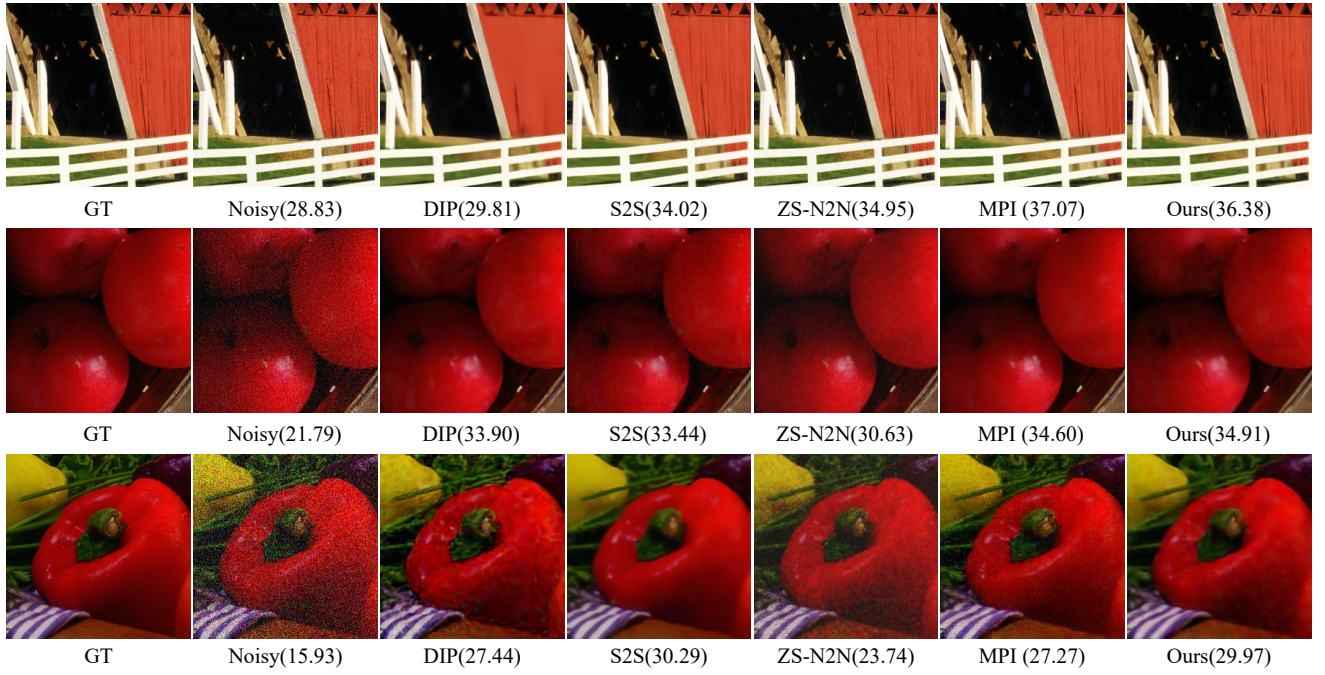

Figure 3. Gaussian denoising on MacMaster18 images. The numbers in parentheses are PSNR scores (dB). Upper row:  $\sigma = 10$ , middle row:  $\sigma = 25$ , lower row;  $\sigma = 50$ .

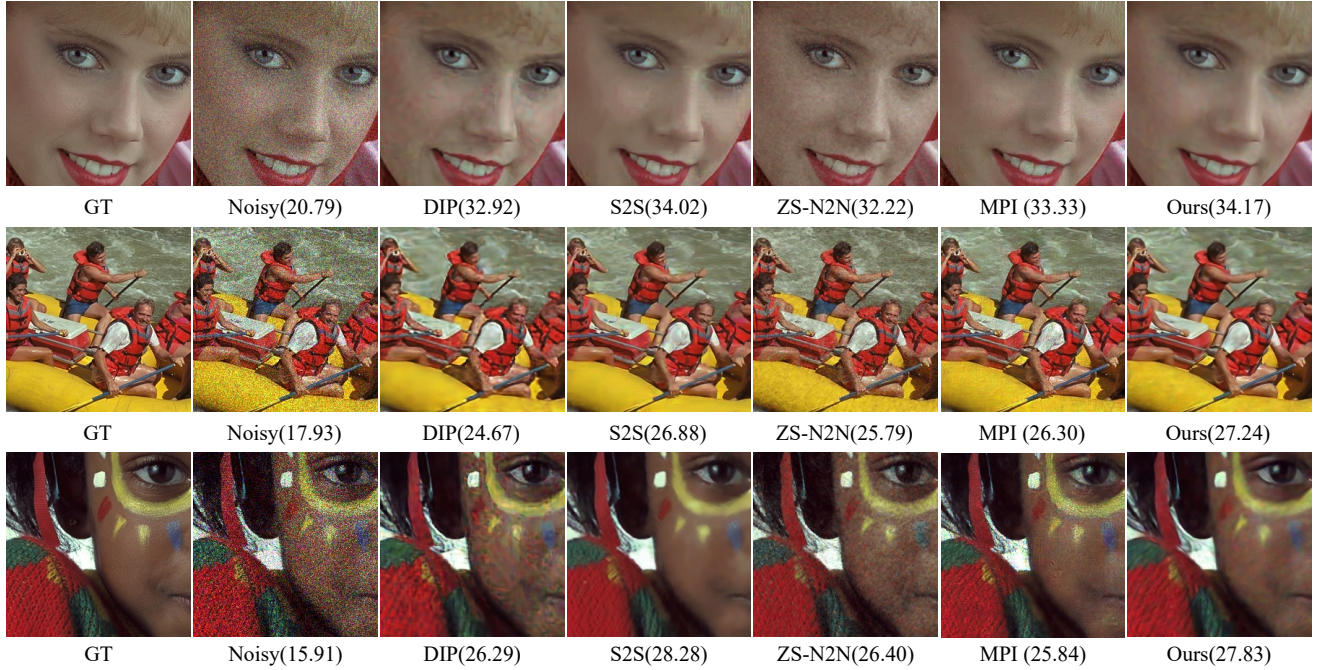

Figure 4. Poisson denoising on Kodak24 images. The numbers in parentheses are PSNR scores (dB). Upper row:  $\lambda = 50$ , middle row:  $\lambda = 25$ , lower row;  $\lambda = 10$ .

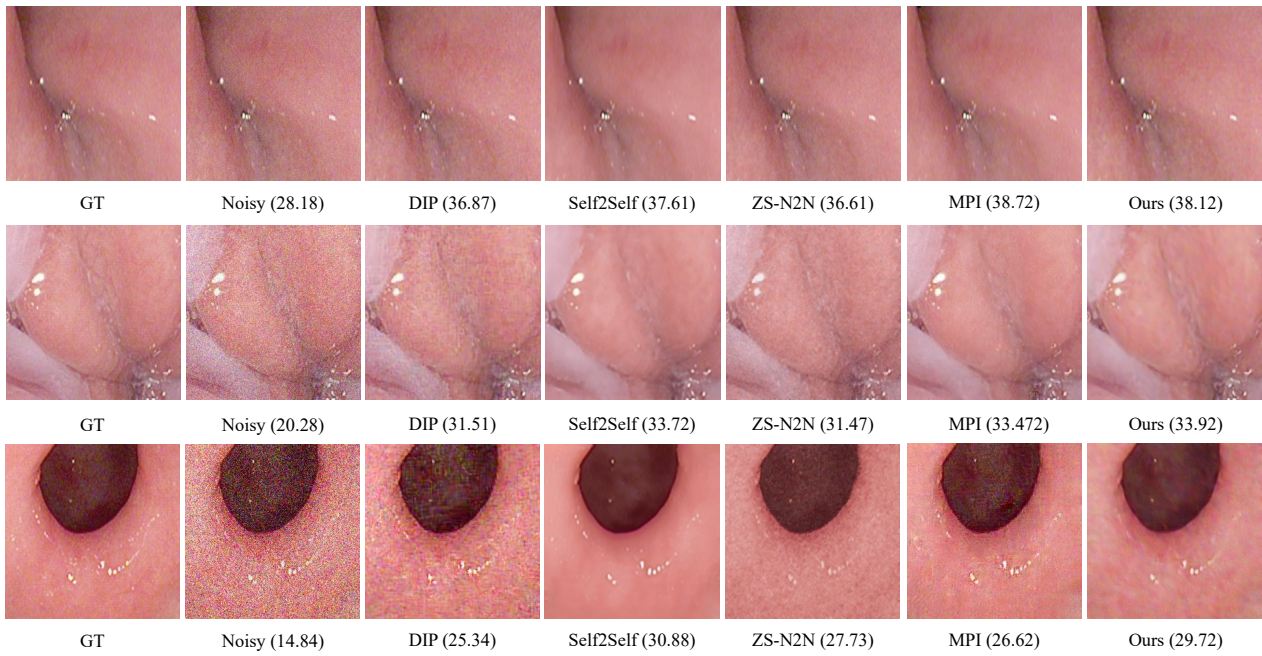

Figure 5. Gaussian denoising on KVASIR20 images. The numbers in parentheses are PSNR scores (dB). Upper row:  $\sigma = 10$ , middle row:  $\sigma = 25$ , lower row;  $\sigma = 50$ .
